# Supplementary material for: Search for Ancestral Features in Genomes of Rhizobium leguminosarum bv. viciae Strains Isolated from the Relict Legume Vavilovia formosa
Source: PubMed Central journal article supplement (PMC6969944; doi:10.3390/genes10120990), 2019-12-01
Supplement: genes-10-00990-s001.pdf [file genes-10-00990-s001.pdf]

**Table S1.** Average nucleotide identity of genomes of *Rhizobium leguminosarum* bv. *viciae* strains.

|         | 248     | 3841    | TOM     | Vaf-10  | Vaf-108 | Vaf-12  | WSM1481 |
|---------|---------|---------|---------|---------|---------|---------|---------|
| 248     | 100,00% |         |         |         |         |         |         |
| 3841    | 94,38%  | 100,00% |         |         |         |         |         |
| TOM     | 94,66%  | 94,24%  | 100,00% |         |         |         |         |
| Vaf-10  | 94,63%  | 94,28%  | 95,34%  | 100,00% |         |         |         |
| Vaf-108 | 94,99%  | 94,30%  | 95,36%  | 96,26%  | 100,00% |         |         |
| Vaf-12  | 94,44%  | 95,10%  | 94,56%  | 94,95%  | 95,11%  | 100,00% |         |
| WSM1481 | 94,31%  | 95,85%  | 94,22%  | 94,25%  | 94,28%  | 95,08%  | 100,00% |

**Table S2.** Average nucleotide identity of chromosomes of *Rhizobium leguminosarum* bv. *viciae* strains.

|         | 248     | 3841    | TOM     | Vaf-10  | Vaf-12  | Vaf-108 | WSM1481 |
|---------|---------|---------|---------|---------|---------|---------|---------|
| 248     | 100,00% |         |         |         |         |         |         |
| 3841    | 94,47%  | 100,00% |         |         |         |         |         |
| TOM     | 94,89%  | 94,42%  | 100,00% |         |         |         |         |
| Vaf-10  | 94,89%  | 94,50%  | 95,69%  | 100,00% |         |         |         |
| Vaf-12  | 94,65%  | 95,30%  | 94,80%  | 94,92%  | 100,00% |         |         |
| Vaf-108 | 95,23%  | 94,51%  | 95,71%  | 95,93%  | 95,06%  | 100,00% |         |
| WSM1481 | 94,53%  | 95,90%  | 94,46%  | 94,49%  | 95,30%  | 94,52%  | 100,00% |

**Table S3.** Core and accessory genome statistics.

| Strain                                 | All strains | Vavilovia's strains | Derived group | Derived group excluding TOM |
|----------------------------------------|-------------|---------------------|---------------|-----------------------------|
| Core genes (99% <= strains <= 100%)    | 3817        | 4607                | 3978          | 4167                        |
| Soft core genes (95% <= strains < 99%) | 0           | 0                   | 0             | 0                           |
| Shell genes (15% <= strains < 95%)     | 4897        | 2892                | 2810          | 1890                        |
| Cloud genes (0% <= strains < 15%)      | 1204        | 0                   | 0             | 0                           |
| Total genes (0% <= strains <= 100%)    | 9918        | 7499                | 6788          | 6057                        |

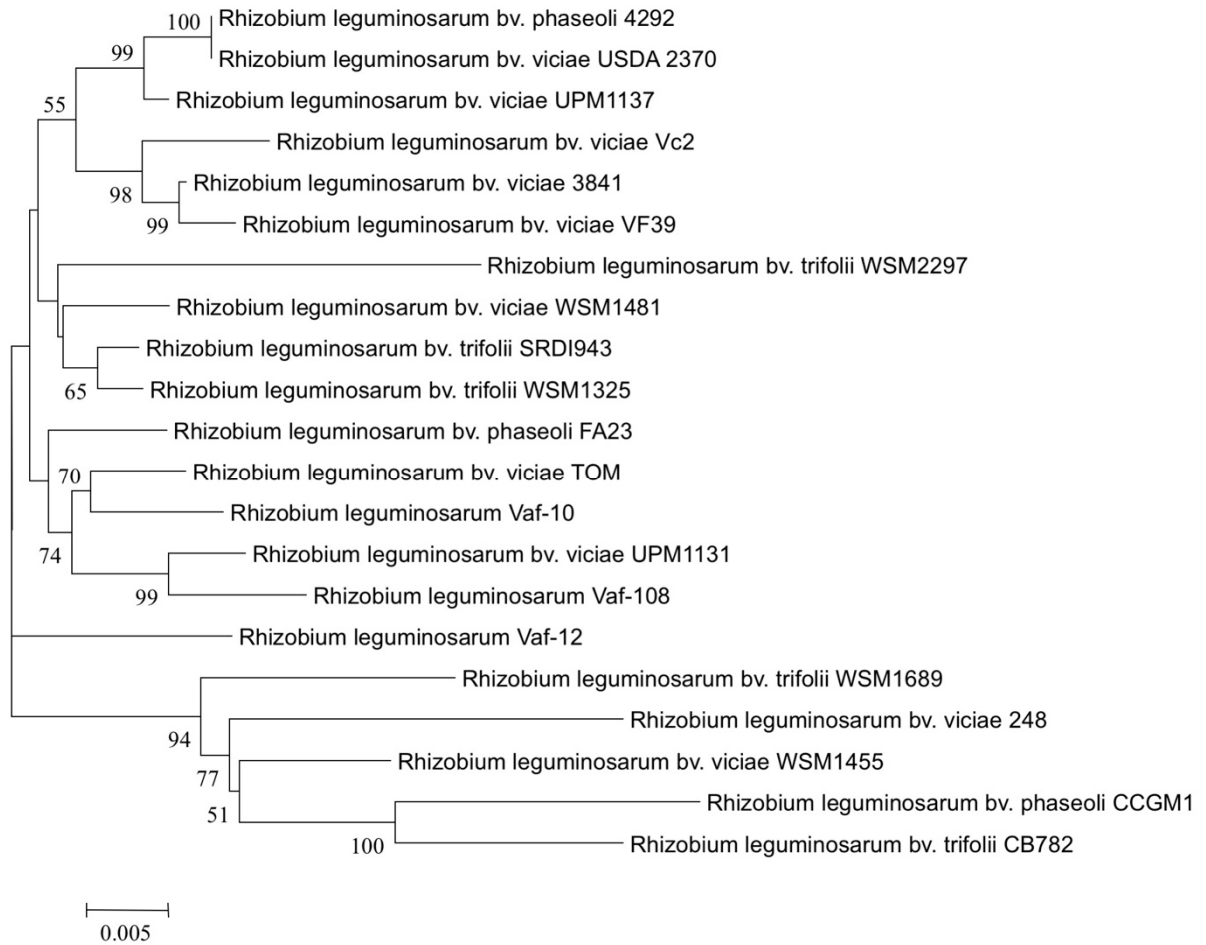

**Figure S1.** Neighbor joining tree for concatenate of core genes (*16S rRNA*, *dnaK*, *glnA* and *gslI*). The evolutionary distances were computed using the maximum composite likelihood method. Values of bootstrap test (1000 replicates) exceeding 50 are shown next to the branches. [19]

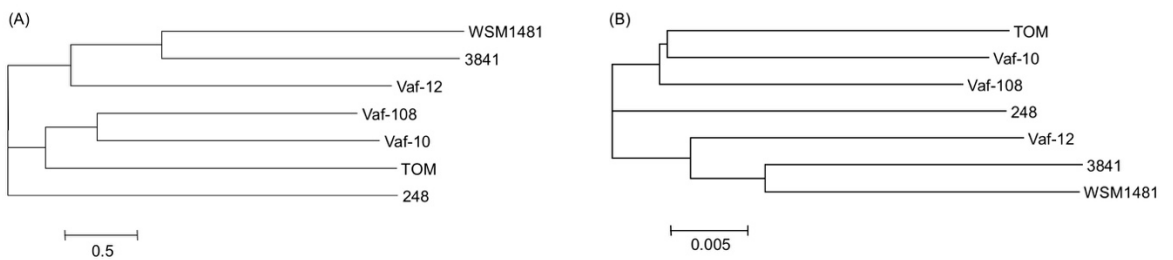

**Figure S2.** ANI-distance clustering. (A) Whole genomes. (B) Chromosomes.

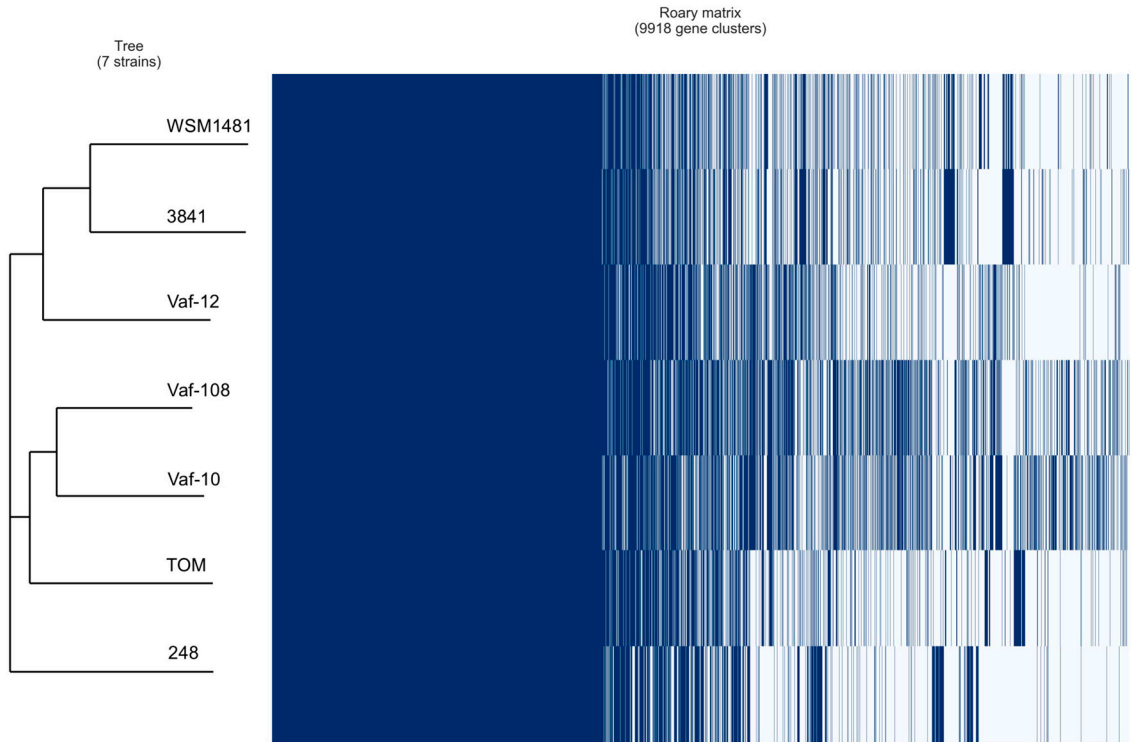

**Figure S3.** The matrix with the presence and absence of core and accessory genes in comparison with phylogram of ANI-distance clustering (Figure S1A).

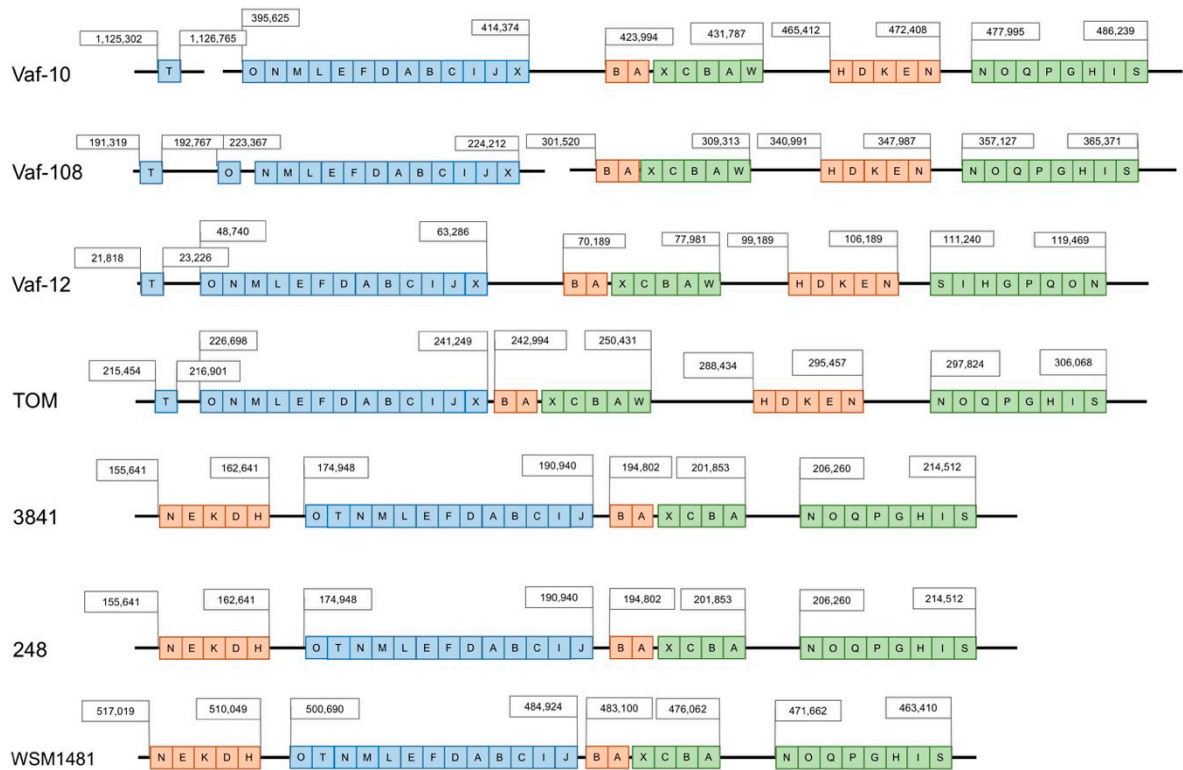

**Figure S4.** Schematic structure of *R. leguminosarum* Sym regions. Blue, *nod* genes; orange, *nif* genes; green, *fix* genes. Nucleotide positions are labeled with flags. Accession numbers of sequences are: Vaf-10, CP016287 (*nodT*), CP016290 (other *sym* genes); Vaf-108, CP018235 (*nod* genes), CP018229 (*nif* and *fix* genes); Vaf-12, KT944070; TOM, AQUC01000005; 3841, NC\_008381; 248, ARRT01000005; WSM1481, AQUM01000002.
